# Supplementary material for: Mucosal Microbiota and Metabolome along the Intestinal Tract Reveal a Location-Specific Relationship
Source: PubMed Central journal article supplement (PMC7253361; doi:10.1128/msystems.00055-20), 2020-05-26

A.

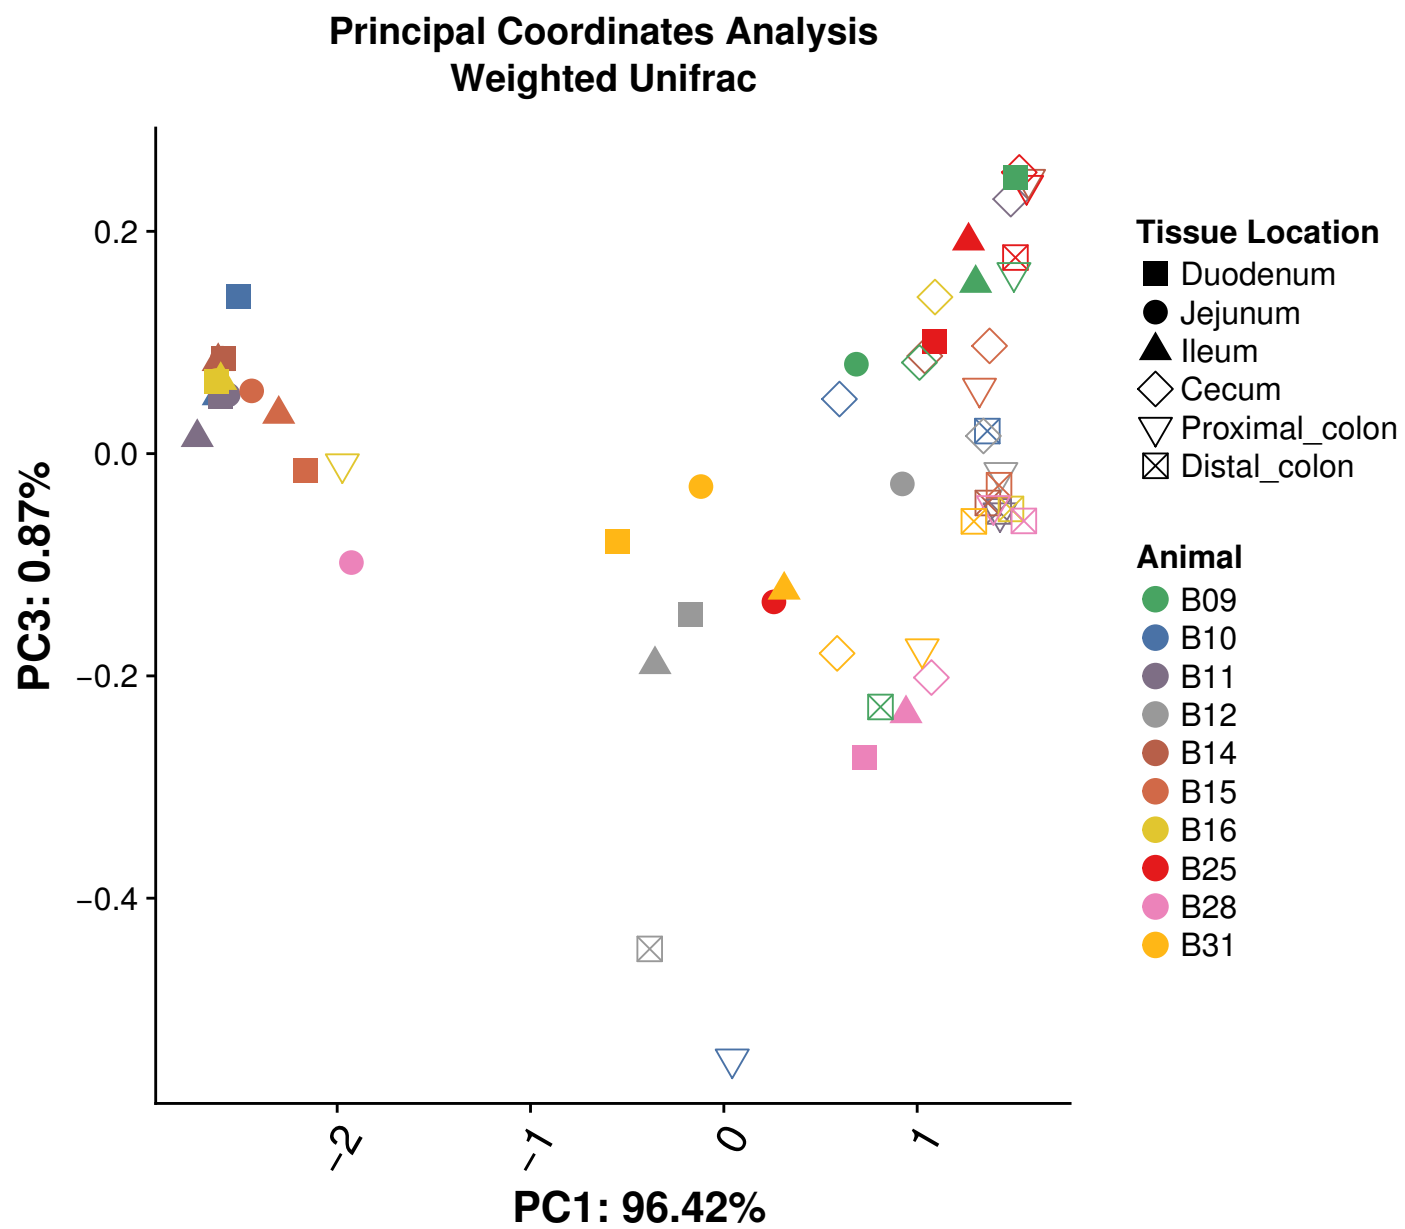

B.

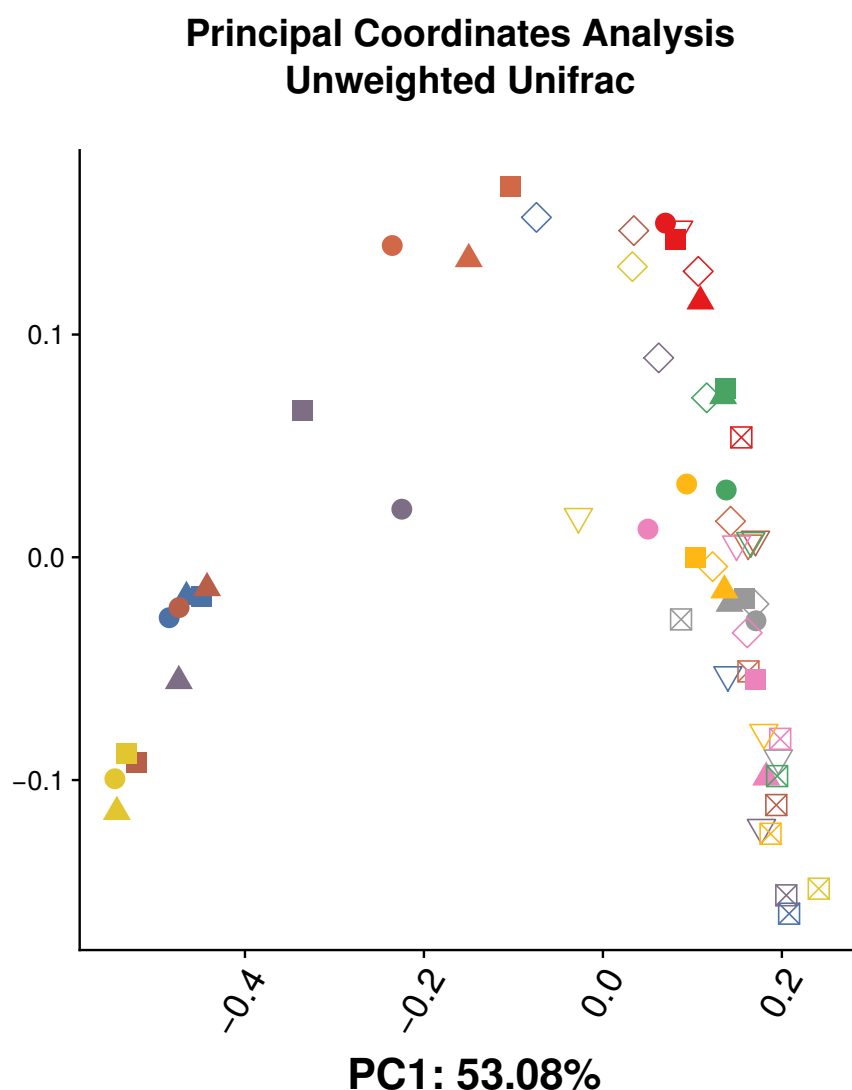

C.

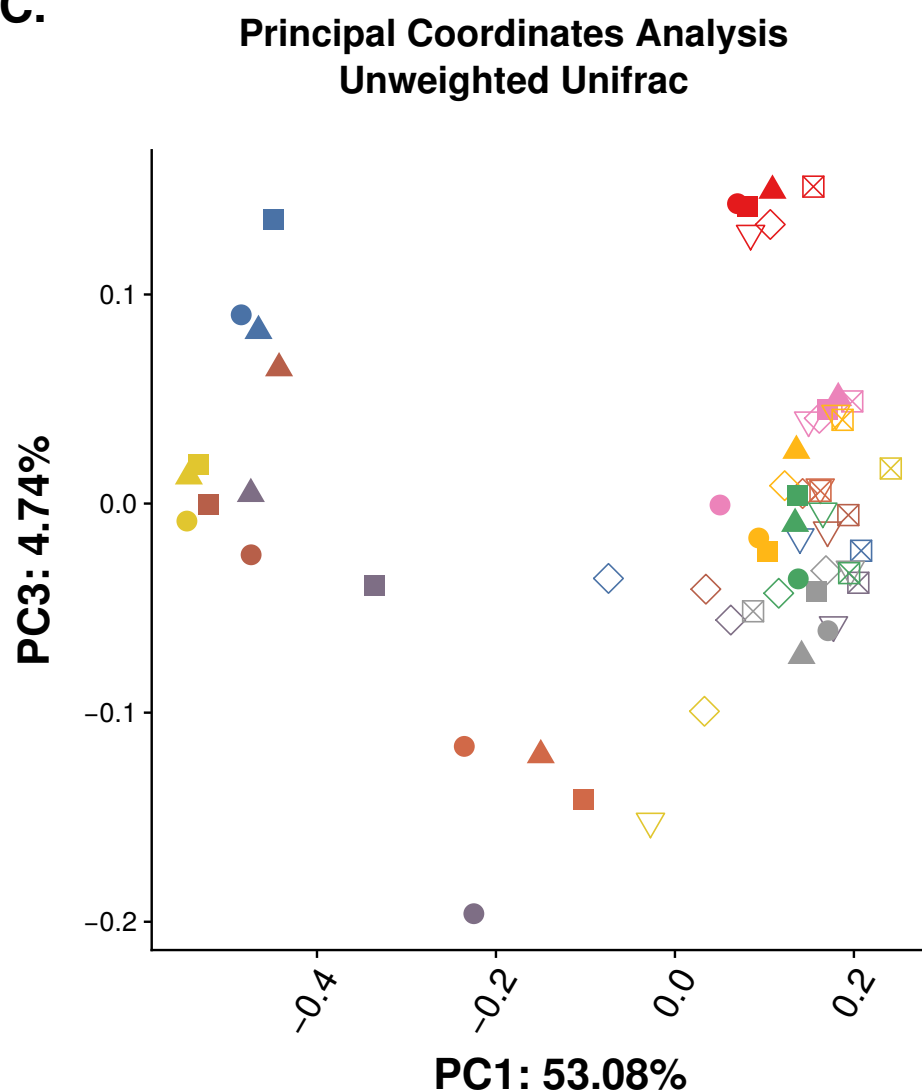

Supplement: mSystems.00055-20-sf001.pdf [file mSystems.00055-20-sf001.pdf]
