# Supplementary material for: Mucosal Microbiota and Metabolome along the Intestinal Tract Reveal a Location-Specific Relationship
Source: PubMed Central journal article supplement (PMC7253361; doi:10.1128/msystems.00055-20), 2020-05-26

A.

Growth of bacteria 1

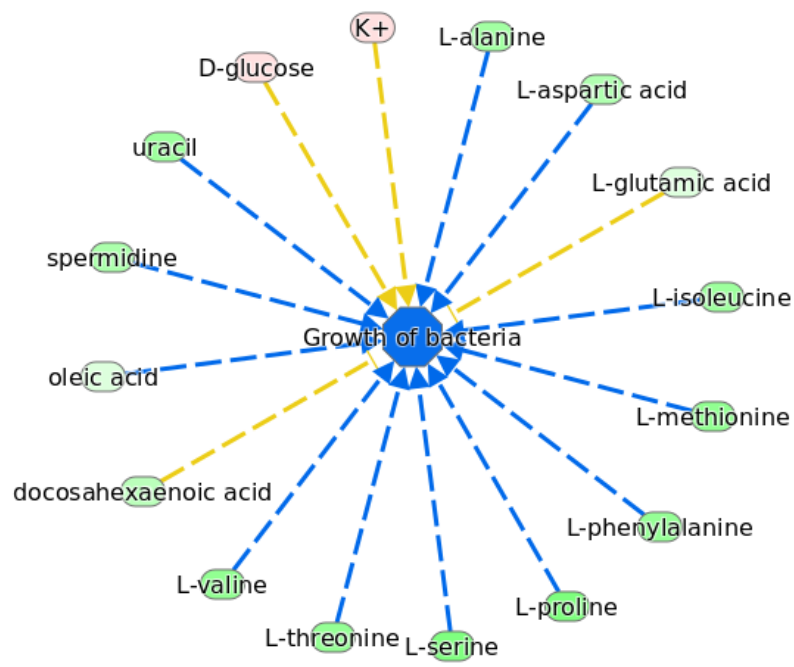

B.

Uptake of amino acids 3

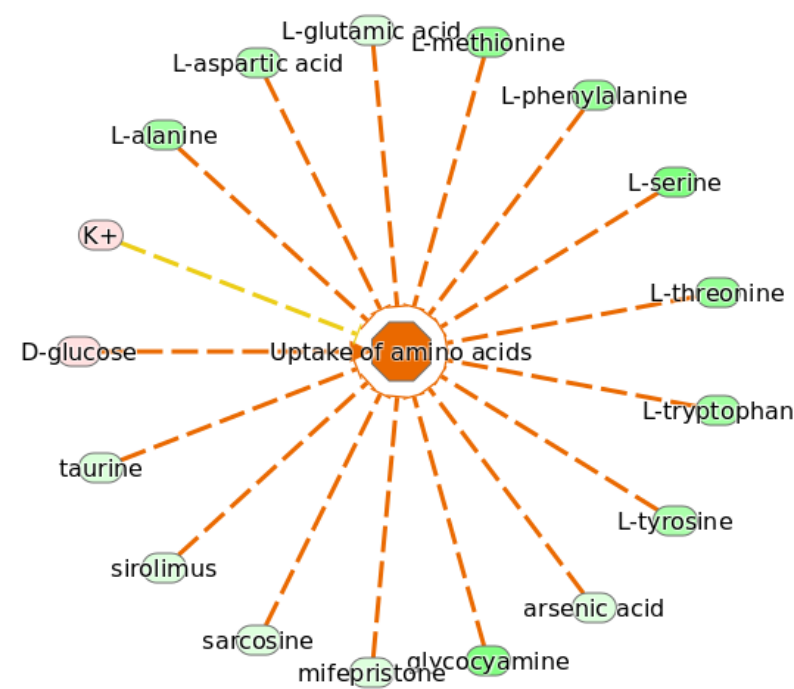

C.

Solid tumor 4

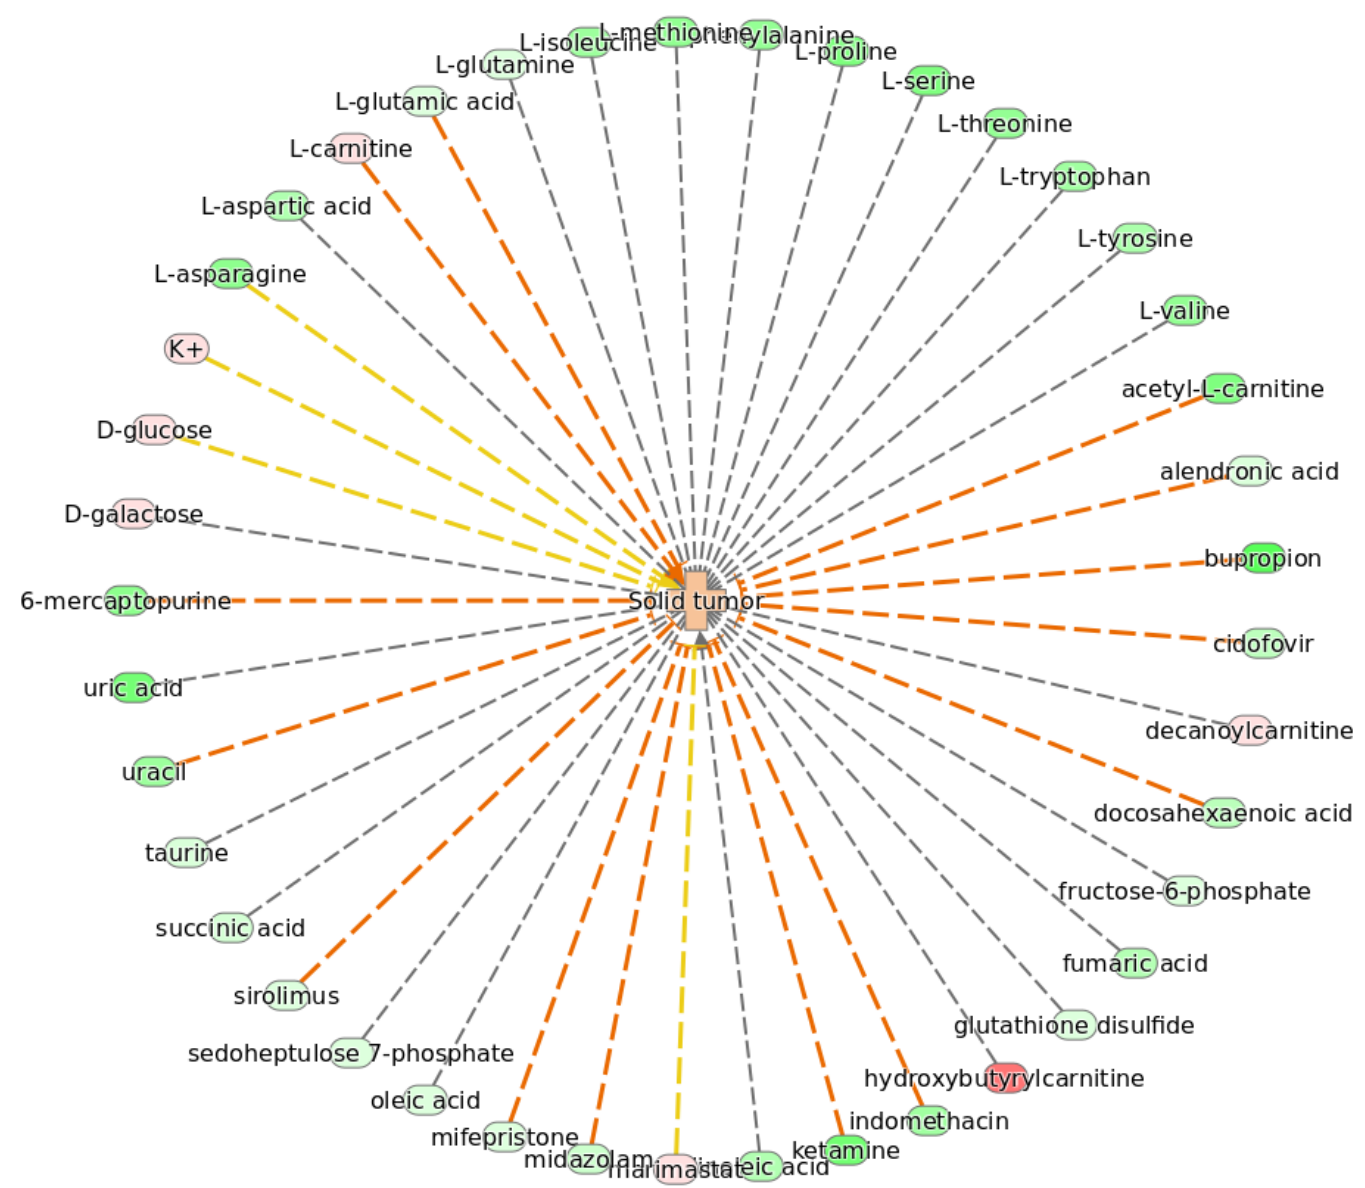

Supplement: mSystems.00055-20-sf002.pdf [file mSystems.00055-20-sf002.pdf]
