# Supplementary material for: Mucosal Microbiota and Metabolome along the Intestinal Tract Reveal a Location-Specific Relationship
Source: PubMed Central journal article supplement (PMC7253361; doi:10.1128/msystems.00055-20), 2020-05-26

**A.** Procrustes – Jejunum

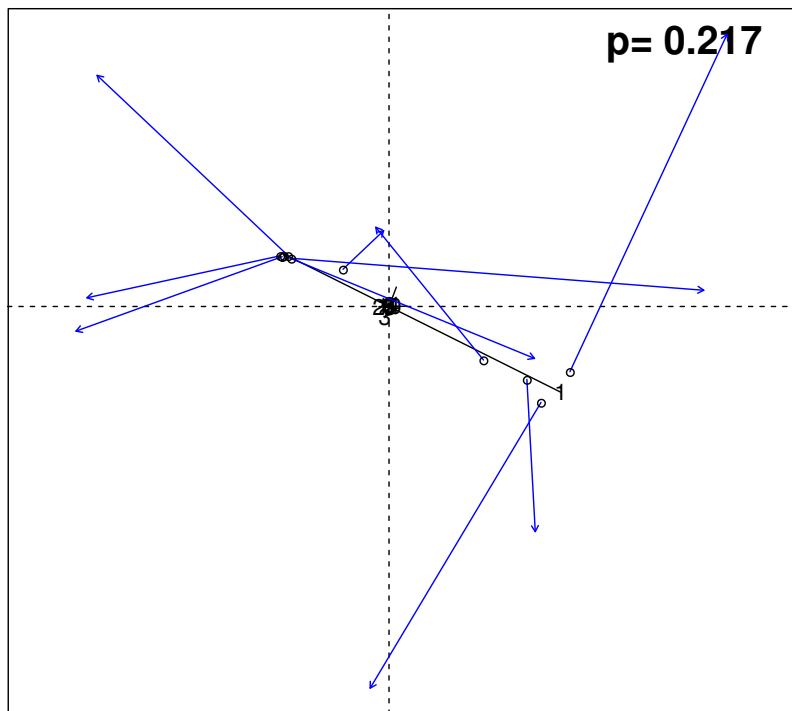

**B.** Procrustes – Duodenum

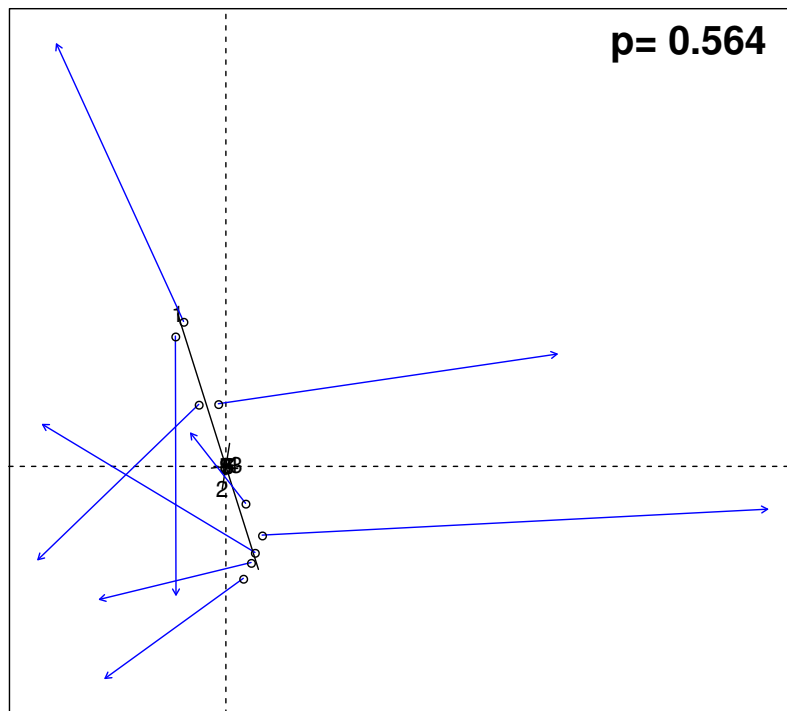

**C.** Procrustes – Ileum

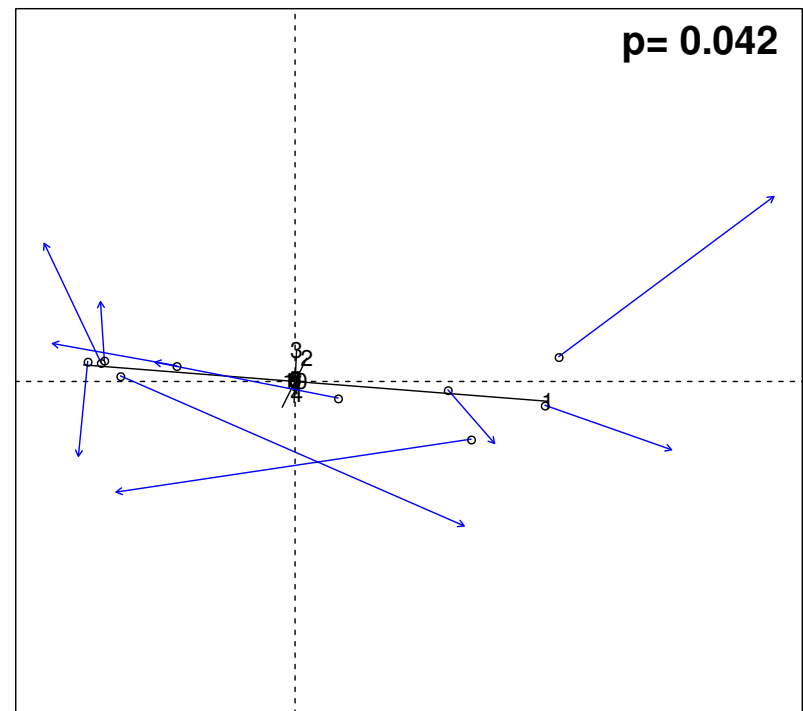

**D.** Procrustes – Cecum

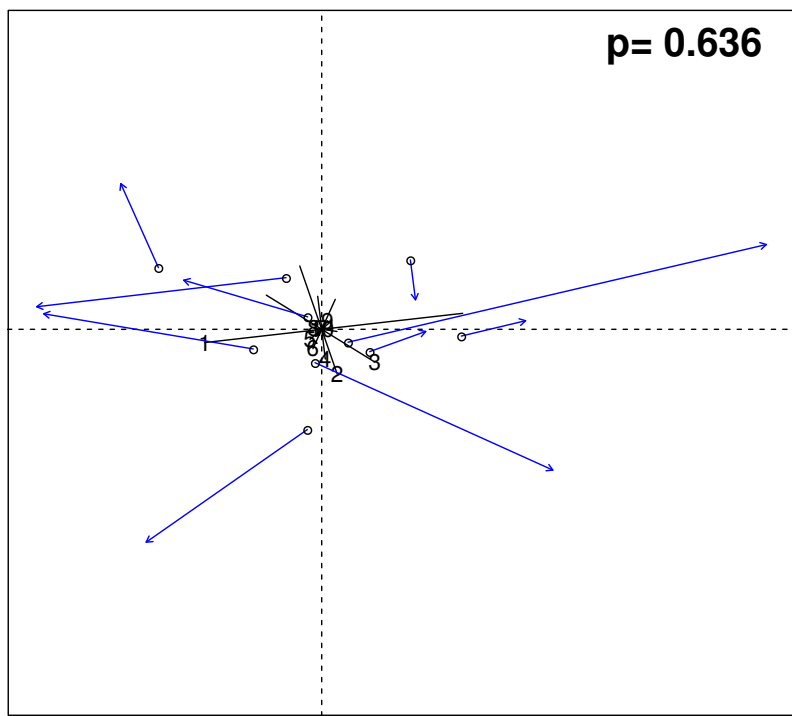

**E.** Procrustes – Proximal colon

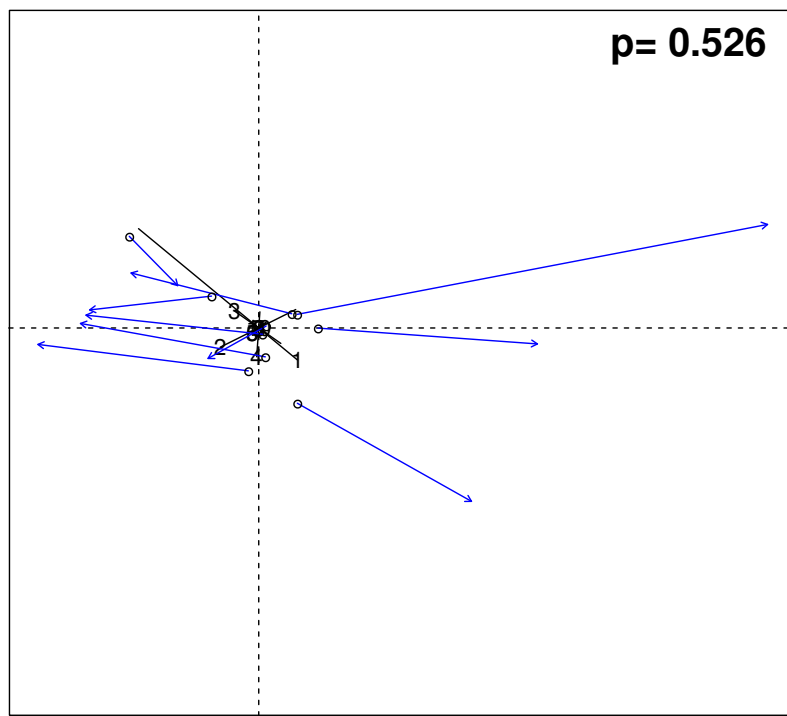

**F.** Procrustes – Distal colon

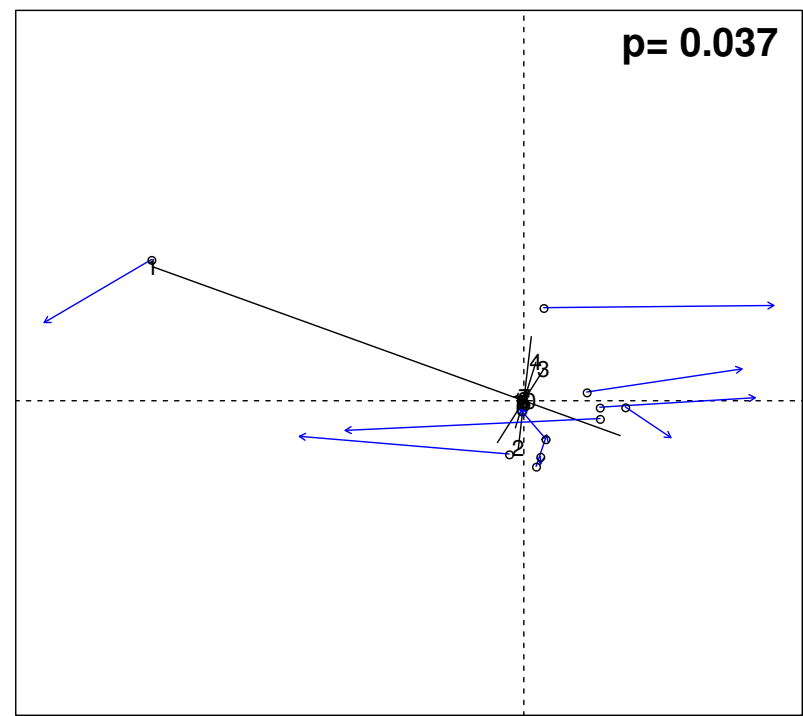

Supplement: mSystems.00055-20-sf003.pdf [file mSystems.00055-20-sf003.pdf]
